# Supplementary material
Source: publisher figshare collection journal article supplement (https://diabetesjournals.figshare.com/articles/dataset/_/16811251)
Supplement: Supplementary file 1 [file 1]

**TABLE S1****List of primary and secondary antibodies**

| <b>Name</b>                                 | <b>Species</b> | <b>Company</b>            | <b>Catalog #</b> | <b>Dilution</b>                   |
|---------------------------------------------|----------------|---------------------------|------------------|-----------------------------------|
| Phospho Insulin receptor $\beta$ (Tyr 1150) | Rabbit         | Abcam                     | #ab5681          | 1:1000 (tissue)<br>1:500 (cells)  |
| Insulin receptor $\beta$                    | Rabbit         | Cell Signaling Technology | CST #3020        | 1:1000 (tissue)<br>1:500 (cells)  |
| Phospho AKT (Ser 473)                       | Rabbit         | Cell Signaling Technology | CST #9271        | 1:1000 (tissue)<br>1:500 (cells)  |
| AKT                                         | Rabbit         | Cell Signaling Technology | CST #9272        | 1:1000 (tissue)<br>1:500 (cells)  |
| Phospho FOXO1 (Ser 256)                     | Rabbit         | Cell Signaling Technology | CST #9461        | 1:500 (both tissue and cells)     |
| FOXO1                                       | Rabbit         | Cell Signaling Technology | CST #2880        | 1:500 (both tissue and cells)     |
| Phospho GSK3 $\beta$ (Ser 9)                | Rabbit         | Cell Signaling Technology | CST #5558        | 1:1000 (both tissue and cells)    |
| GSK3 $\beta$                                | Rabbit         | Cell Signaling Technology | CST #9315        | 1:2000 (tissue)<br>1:1000 (cells) |
| $\alpha$ -tubulin                           | Rabbit         | Cell Signaling Technology | CST #2144S       | 1:2000 (tissue)                   |
| Na <sup>+</sup> /K ATPase                   | Rabbit         | Cell Signaling Technology | CST #3010S       | 1:1000 (tissue)                   |
| Calnexin                                    | Rabbit         | Proteintech               | 10427-2-AP       | 1:3000 (tissue)                   |
| Syntaxin 6                                  | Rabbit         | Cell Signaling Technology | C34B2            | 1:500 (tissue)                    |
| IRDye® 800CW secondary antibody             | Rabbit         | LI-COR Biosciences        | 929-08972        | 1:10000                           |
| Peroxidase Donkey Anti-Rabbit IgG           | Rabbit         | Jackson ImmunoResearch    | 711-035-152      | 1:4000                            |
