# Supplementary material
Source: publisher figshare collection journal article supplement (https://diabetesjournals.figshare.com/articles/dataset/_/16811251)
Supplement: Supplementary file 3 [file 1]

**TABLE S2****List of primers and PCR conditions**

| <b>Gene</b>                              | <b>Species</b> | <b>Primers</b>                                                     | <b>PCR conditions</b>                                            | <b>Ref</b> |
|------------------------------------------|----------------|--------------------------------------------------------------------|------------------------------------------------------------------|------------|
| <b>Glucose-6-phosphatase</b>             | Mouse          | F: 5'-GACTCCCAGGACTGGTTCAT-3'<br>R: 5'-GGGCGTTGTCCAAACAGAAT 3'     | 95°C 3 min, 1 cycle<br>95°C 30s, 53°C 30s, 40 cycles<br>72°C 30s | (1)        |
| <b>Fructose-1,6-bisphosphatase</b>       | Mouse          | F: 5'-TCAACTGCTTCATGCTGGAC-3'<br>R: 5'-GGGTCAAAGTCCTTGGCATA-3'     | 95°C 3 min, 1 cycle<br>95°C 30s, 58°C 30s, 40 cycles<br>72°C 30s | (2)        |
| <b>Phosphoenolpyruvate carboxykinase</b> | Mouse          | F: 5'-GTCTATGAAGCCCTCAGCT-3'<br>R: 5'-AAGAAGGGTCGCATGGCAA-3'       | 95°C 3 min, 1 cycle<br>95°C 30s, 59°C 30s, 40 cycles<br>72°C 30s | (1)        |
| <b>Glycogen synthase 2</b>               | Mouse          | F: 5'-CCAGCTTGACAAGTTGACA-3'<br>R: 5'-ATCAGGCTTCCTCTTCAGCA-3'      | 95°C 3 min, 1 cycle<br>95°C 30s, 59°C 30s, 40 cycles<br>72°C 30s | (3)        |
| <b>GAPDH</b>                             | Mouse          | F: 5'-TGGAGAAACCTGCCAAGTATGA-3'<br>R: 5'-GAAGAGTGGGAGTTGCTGTTGA-3' | According to PCR conditions of the 4 genes analyzed              | (4)        |

1. Chen N, Liu L, Zhang Y, Ginsberg HN, Yu YH: Whole-body insulin resistance in the absence of obesity in FVB mice with overexpression of Dgat1 in adipose tissue. *Diabetes* 2005;54:3379-3386
2. Pittala S, Krelin Y, Kuperman Y, Shoshan-Barmatz V: A Mitochondrial VDAC1-Based Peptide Greatly Suppresses Steatosis and NASH-Associated Pathologies in a Mouse Model. *Mol Ther* 2019;27:1848-1862
3. Doi R, Oishi K, Ishida N: CLOCK regulates circadian rhythms of hepatic glycogen synthesis through transcriptional activation of Gys2. *J Biol Chem* 2010;285:22114-22121
4. Skrypnyk NI, Gist KM, Okamura K, Montford JR, You Z, Yang H, Moldovan R, Bodoni E, Blaine JT, Edelstein CL, Soranno DE, Kirkbride-Romeo LA, Griffin BR, Altmann C, Faubel S: IL-6-mediated hepatocyte production is the primary source of plasma and urine neutrophil gelatinase-associated lipocalin during acute kidney injury. *Kidney Int* 2020;97:966-979
